# Supplementary material for: Effectiveness and Safety of the Korean Medicine Senior Health Promotion Program Using Herbal Medicine and Acupuncture for Mild Cognitive Impairment: A Retrospective Study of 500 Patients in Seoul, Korea
Source: Hindawi journal article supplement (doi:10.1155/2021/8820705), 2021-12-06
Supplement: f1 [file 8820705.f1.pdf]

**Supplementary table 1.** The detailed profile of participants with newly identified liver injury or suspected kidney disease

| Case                                 | Age / Sex |     | Clinical characteristics                          |                               |                |         |         |          | Herbal medicine |                                                        |                              | Lab    |     |             |             |     |      |      |       |     |     |             |             |     |      |      |      |
|--------------------------------------|-----------|-----|---------------------------------------------------|-------------------------------|----------------|---------|---------|----------|-----------------|--------------------------------------------------------|------------------------------|--------|-----|-------------|-------------|-----|------|------|-------|-----|-----|-------------|-------------|-----|------|------|------|
|                                      | Age       | Sex | Medical history                                   | Medication                    | Family history | Smoking | Alcohol | Exercise | Dosage form     | Formula                                                | Duration                     | Before |     |             |             |     |      |      | After |     |     |             |             |     |      |      |      |
|                                      |           |     |                                                   |                               |                |         |         |          |                 |                                                        |                              | AST    | ALT | T-bilirubin | D-bilirubin | ALP | G-GT | BUN  | Cr    | AST | ALT | T-bilirubin | D-bilirubin | ALP | G-GT | BUN  | Cr   |
| Liver injury<br>- Case 1             | 70        | F   | Depression, Stroke,<br>Hypertension, Dyslipidemia | Hypertension,<br>Dyslipidemia | None           | Yes     | Yes     | Yes      | Decoction       | Guibi-tang                                             | 15 days                      | 26     | 23  | 0.64        | 0.19        | 192 | 26   | 13.4 | 0.72  | 28  | 21  | 0.66        | 0.2         | 308 | 27   | 17.1 | 0.78 |
| Liver injury<br>- Case 2             | 63        | F   | Dyslipidemia                                      | Dyslipidemia                  | None           | No      | No      | No       | Extract         | Modified Guibi-tang                                    | 20 days                      | 32     | 26  | 0.55        | 0.16        | 225 | 15   | 11.5 | 0.82  | 20  | 19  | 0.36        | 0.08        | 244 | 18   | 18.6 | 0.8  |
| Liver injury<br>- Case 3             | 85        | F   | Hypertension                                      | Hypertension,<br>Tranquilizer | None           | No      | No      | Yes      | Extract         | 1st: Modified Guibi-tang<br>2nd: Hwangnyeonhaedok-tang | 1st: 50 days<br>2nd: 10 days | 21     | 14  | 0.84        | 0.29        | 237 | 17   | 20   | 0.81  | 20  | 14  | 0.66        | 0.19        | 242 | 19   | 25.9 | 1.05 |
| Suspected kidney disease<br>- Case 1 | 82        | M   | Hypertension                                      | Hypertension                  | None           | No      | No      | Yes      | Extract         | Modified Guibi-tang                                    | 20 days                      | 28     | 31  | 1.17        | 0.48        | 215 | 39   | 29.1 | 1.5   | 38  | 33  | 1.36        | 0.42        | 177 | 28   | 25.5 | 1.53 |
